# Supplementary material for: Raul Lino and the City
Source: Preprints.org preprint supplement (doi:10.20944/preprints201902.0138.v1), 2019-02-18

ACORDO DE CEDÊNCIA E/OU DIVULGAÇÃO DE REPRODUÇÕES - PESSOAS

Processo n.º / 2019

- |                                                                      |                                                                                   |
|----------------------------------------------------------------------|-----------------------------------------------------------------------------------|
| <input type="checkbox"/> Cópias digitais gravadas em disco           | <input type="checkbox"/> Impressões executadas pelo leitor                        |
| <input type="checkbox"/> Digitalizações executadas pelo leitor       | <input type="checkbox"/> Cópias digitais enviadas por correio eletrónico pela BAA |
| <input type="checkbox"/> Fotografias digitais executadas pelo leitor | <input checked="" type="checkbox"/> Divulgação de imagens disponíveis na Web      |
| <input type="checkbox"/> Impressões executadas pela BAA              |                                                                                   |

Entre a Fundação Calouste Gulbenkian, com sede na Av. de Berna 45 A, PT 1067-001, Lisboa, com o n.º de registo de pessoa coletiva 500745684 e PAULO ALEXANDRE LVES STRASSO MANTA PEREIRA, B.I./ Cartão de Cidadão n.º 666 1855, válido até 16 /12 /2019 é celebrado acordo de cedência e utilização de reproduções de documentos da Biblioteca de Arte da Fundação Calouste Gulbenkian, com as seguintes condições:

1. O presente acordo aplica-se às seguintes espécies: **RLDA177.38; RLDA279.9 e 10; RLDA24.9**
2. O segundo declarante declara que as imagens requisitadas à Fundação Calouste Gulbenkian se destinam a:

PUBLICAÇÃO NO REPOSITÓRIO CIENTÍFICO ABSTRACT ONLINE: <https://preprints.org>

3. As imagens incluídas no presente acordo pela Fundação Calouste Gulbenkian só poderão ser utilizadas para os fins declarados no ponto 2, não se responsabilizando a Fundação Calouste Gulbenkian por quaisquer danos resultantes de outra utilização destas mesmas imagens.

4. O segundo declarante declara ter tomado conhecimento das Regras Gerais de Reprodução de Documentos da Biblioteca de Arte, bem como do texto dos Termos e Condições de Utilização aplicáveis às coleções a que pertencem as imagens cedidas, documento consultável no catálogo da Biblioteca de Arte e igualmente anexado.

Lisboa, 12 de fevereiro de 2019

Biblioteca de Arte e Arquivos  
Fundação Calouste Gulbenkian

O segundo declarante

**ANEXOS:**

1. Reprodução de documentos da Biblioteca de Arte: regras gerais
2. Coleção **Espólio Raul Lino**: termos e condições de utilização

**ACORDO DE CEDÊNCIA E/OU DIVULGAÇÃO DE REPRODUÇÕES - PESSOAS**

**ANEXO 1**

**REPRODUÇÃO DE DOCUMENTOS DA BIBLIOTECA DE ARTE - REGRAS GERAIS**

1. As reproduções de obras da Biblioteca de Arte destinam-se a investigação, estudo e documentação estritamente pessoal. A sua utilização para quaisquer outros fins está sujeita ao cumprimento, da inteira responsabilidade do requerente, da legislação sobre direitos de autor, direitos de personalidade ou outros aplicáveis às espécies reproduzidas.
2. A utilização de reproduções de imagens de obras da Biblioteca de Arte, para quaisquer outros fins, como publicação e divulgação, exige consentimento prévio por escrito da Fundação Calouste Gulbenkian.
3. A Biblioteca de Arte e Arquivos alerta que a realização de reproduções em regime de autosserviço, obriga os leitores ao cumprimento das disposições legais sobre Direitos de Autor e Direitos Conexos aplicáveis.
4. A publicação ou divulgação de reproduções de imagens de obras da Biblioteca de Arte que não se encontrem no domínio público ou às quais se apliquem restrições de difusão baseadas em Direitos de Personalidade ou relativos à Reserva sobre a Intimidade da Vida Privada, exige a obtenção de autorizações junto dos detentores de direitos sobre as obras, da inteira responsabilidade do requerente das reproduções.
5. A reutilização de imagens, anteriormente reproduzidas com consentimento da Fundação Calouste Gulbenkian, para nova publicação ou ato de divulgação, exige a apresentação de novo requerimento para esse efeito.
6. A publicação de imagens de espécies da Biblioteca de Arte, implica a menção da sua proveniência e o envio à BAA de dois exemplares da obra publicada.
7. A Biblioteca de Arte e Arquivos pode fixar restrições ou interditar a reprodução de documentos dos seus fundos, por razões de preservação das espécies ou relacionadas com a legislação aplicável à sua divulgação.

**ANEXO 2**

**Coleção Espólio Raul Lino**

**TERMOS E CONDIÇÕES DE UTILIZAÇÃO**

1. Todos os documentos incluídos na presente coleção estão protegidos por direitos de autor ou são propriedade da Fundação Calouste Gulbenkian, sendo a sua consulta disponibilizada por esta entidade – nos termos da legislação aplicável – na Internet ou unicamente nas suas instalações, através da rede informática interna (Intranet) da Biblioteca de Arte e Arquivos da Fundação Calouste Gulbenkian.
2. Sem prejuízo das exceções permitidas por lei, é proibida a reprodução, alteração, distribuição, comercialização ou difusão da totalidade, ou de parte, dos conteúdos incluídos na presente coleção, salvo consentimento prévio por escrito da Fundação Calouste Gulbenkian.
3. A Fundação Calouste Gulbenkian não se responsabiliza por quaisquer danos resultantes da utilização não autorizada dos conteúdos da presente coleção.
4. Embora a Fundação Calouste Gulbenkian, através da sua Biblioteca de Arte e Arquivos, tenha envidado todos os esforços nesse sentido, não foi possível estabelecer a autoria da totalidade dos documentos contidos na presente coleção. Agradece-se a quem tiver conhecimento desses elementos, o favor de os comunicar, através do endereço [artlib@gulbenkian.pt](mailto:artlib@gulbenkian.pt), aos serviços da Biblioteca de Arte e Arquivos da Fundação Calouste Gulbenkian, para que essa informação possa ser atualizada e os créditos atribuídos a quem, de direito, seja o seu titular.

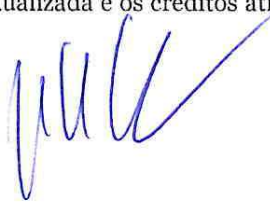



ACORDO DE CEDÊNCIA E/OU DIVULGAÇÃO DE REPRODUÇÕES - PESSOAS

Processo n.º / 2019

- |                                                                      |                                                                                   |
|----------------------------------------------------------------------|-----------------------------------------------------------------------------------|
| <input type="checkbox"/> Cópias digitais gravadas em disco           | <input type="checkbox"/> Impressões executadas pelo leitor                        |
| <input type="checkbox"/> Digitalizações executadas pelo leitor       | <input type="checkbox"/> Cópias digitais enviadas por correio eletrónico pela BAA |
| <input type="checkbox"/> Fotografias digitais executadas pelo leitor | <input checked="" type="checkbox"/> Divulgação de imagens disponíveis na Web      |
| <input type="checkbox"/> Impressões executadas pela BAA              |                                                                                   |

Entre a Fundação Calouste Gulbenkian, com sede na Av. de Berna 45 A, PT 1067-001, Lisboa, com o n.º de registo de pessoa coletiva 500745684 e PAULO ALEXANDRE ALVES BARROSO MANTA PEREIRA, B.I./ Cartão de Cidadão n.º 06661855, válido até 16/12/2019 é celebrado acordo de cedência e utilização de reproduções de documentos da Biblioteca de Arte da Fundação Calouste Gulbenkian, com as seguintes condições:

1. O presente acordo aplica-se às seguintes espécies: **CFT164.892**
2. O segundo declarante declara que as imagens requisitadas à Fundação Calouste Gulbenkian se destinam a:

PUBLICAÇÃO NO REPOSITÓRIO CIENTÍFICO ABERTO ONLINE: <https://preprints.org>

3. As imagens incluídas no presente acordo pela Fundação Calouste Gulbenkian só poderão ser utilizadas para os fins declarados no ponto 2, não se responsabilizando a Fundação Calouste Gulbenkian por quaisquer danos resultantes de outra utilização destas mesmas imagens.

4. O segundo declarante declara ter tomado conhecimento das Regras Gerais de Reprodução de Documentos da Biblioteca de Arte, bem como do texto dos Termos e Condições de Utilização aplicáveis às coleções a que pertencem as imagens cedidas, documento consultável no catálogo da Biblioteca de Arte e igualmente anexado.

Lisboa, 12 de fevereiro de 2019

Biblioteca de Arte e Arquivos  
Fundação Calouste Gulbenkian

O segundo declarante

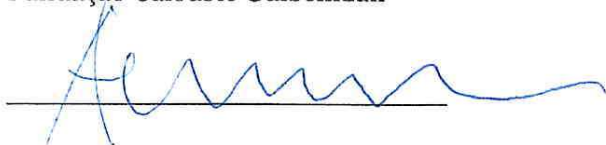

**ANEXOS:**

1. Reprodução de documentos da Biblioteca de Arte: regras gerais
2. Coleção **Estúdio Horácio Novais**: termos e condições de utilização

**ACORDO DE CEDÊNCIA E/OU DIVULGAÇÃO DE REPRODUÇÕES - PESSOAS**

**ANEXO 1**

**REPRODUÇÃO DE DOCUMENTOS DA BIBLIOTECA DE ARTE - REGRAS GERAIS**

1. As reproduções de obras da Biblioteca de Arte destinam-se a investigação, estudo e documentação estritamente pessoal. A sua utilização para quaisquer outros fins está sujeita ao cumprimento, da inteira responsabilidade do requerente, da legislação sobre direitos de autor, direitos de personalidade ou outros aplicáveis às espécies reproduzidas.
2. A utilização de reproduções de imagens de obras da Biblioteca de Arte, para quaisquer outros fins, como publicação e divulgação, exige consentimento prévio por escrito da Fundação Calouste Gulbenkian.
3. A Biblioteca de Arte e Arquivos alerta que a realização de reproduções em regime de autosserviço, obriga os leitores ao cumprimento das disposições legais sobre Direitos de Autor e Direitos Conexos aplicáveis.
4. A publicação ou divulgação de reproduções de imagens de obras da Biblioteca de Arte que não se encontrem no domínio público ou às quais se apliquem restrições de difusão baseadas em Direitos de Personalidade ou relativos à Reserva sobre a Intimidade da Vida Privada, exige a obtenção de autorizações junto dos detentores de direitos sobre as obras, da inteira responsabilidade do requerente das reproduções.
5. A reutilização de imagens, anteriormente reproduzidas com consentimento da Fundação Calouste Gulbenkian, para nova publicação ou ato de divulgação, exige a apresentação de novo requerimento para esse efeito.
6. A publicação de imagens de espécies da Biblioteca de Arte, implica a menção da sua proveniência e o envio à BAA de dois exemplares da obra publicada.
7. A Biblioteca de Arte e Arquivos pode fixar restrições ou interditar a reprodução de documentos dos seus fundos, por razões de preservação das espécies ou relacionadas com a legislação aplicável à sua divulgação.

**ANEXO 2**

**Coleção Estúdio Horácio Novais**

**TERMOS E CONDIÇÕES DE UTILIZAÇÃO**

1. Todos os documentos incluídos na presente coleção estão protegidos por direitos de autor ou são propriedade da Fundação Calouste Gulbenkian, sendo a sua consulta disponibilizada por esta entidade – nos termos da legislação aplicável – na Internet ou unicamente nas suas instalações, através da rede informática interna (Intranet) da Biblioteca de Arte e Arquivos da Fundação Calouste Gulbenkian.
2. Sem prejuízo das exceções permitidas por lei, é proibida a reprodução, alteração, distribuição, comercialização ou difusão da totalidade, ou de parte, dos conteúdos incluídos na presente coleção, salvo consentimento prévio por escrito da Fundação Calouste Gulbenkian.
3. A Fundação Calouste Gulbenkian não se responsabiliza por quaisquer danos resultantes da utilização não autorizada dos conteúdos da presente coleção.
4. Embora a Fundação Calouste Gulbenkian, através da sua Biblioteca de Arte e Arquivos, tenha envidado todos os esforços nesse sentido, não foi possível estabelecer a autoria da totalidade dos documentos contidos na presente coleção. Agradece-se a quem tiver conhecimento desses elementos, o favor de os comunicar, através do endereço [artlib@gulbenkian.pt](mailto:artlib@gulbenkian.pt), aos serviços da Biblioteca de Arte e Arquivos da Fundação Calouste Gulbenkian, para que essa informação possa ser atualizada e os créditos atribuídos a quem, de direito, seja o seu titular.





## DECLARAÇÃO

Martinho Pimentel, residente na Rua do Roseiral nº3 e 5 - 2710-501 São Pedro de Sintra, com o endereço de correio eletrónico: [martinhopimentel@gmail.com](mailto:martinhopimentel@gmail.com), na qualidade de bisneto de Raul Lino e representando os herdeiros do arquiteto, vem autorizar o direito de publicação das seguintes imagens a Paulo Alexandre Alves Barroso Manta Pereira no âmbito do artigo "Raul Lino and the City", que pretende publicar no site <https://www.preprints.org/>

- Desenhos de "Fachada de estylização tradicional portuguesa" publicados na revista *A Construção Moderna*, n.º 6 (16 Abr. 1900);
- Cópia da fotografia da Casa Elisa Vaz, na Avenida da República, n.º 57, publicada no Catálogo da Exposição Retrospectiva na Gulbenkian;
- Planta do piso térreo do "Cinema Tivoli," constante do Espólio do Arquiteto Raul Lino na Biblioteca de Arte da Fundação Calouste Gulbenkian (BA/FCG), sob a cota RLDA 177.38;
- Desenhos do "Projecto de sala de espectáculos para ser construída num terreno entre as ruas 31 de Janeiro e da Madeira, na cidade do Porto, propriedade de Miranda e Filhos," existentes no Espólio do Arquiteto Raul Lino, na BA/FCG sob as cotas RLDA 279.9 e 279.10;
- Planta do piso térreo da "Casa do Cipreste" constante do Espólio do Arquiteto Raul Lino na BA/FCG sob a cota RLDA 24.9.ic.

São Pedro de Sintra,

10 de Fevereiro de 2019



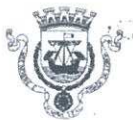

CÂMARA MUNICIPAL DE LISBOA  
DEPARTAMENTO DE PATRIMÓNIO CULTURAL  
DIVISÃO DE ARQUIVO MUNICIPAL

## PERMISSÃO DE UTILIZAÇÃO DE IMAGEM(NS)

Para os devidos efeitos, declara-se que o Arquivo Municipal de Lisboa autoriza que as imagens abaixo identificadas, requeridas por Paulo Alexandre Alves Barroso Manta Pereira, em 20/09/2017, sejam utilizadas na publicação intitulada \_\_\_\_\_, a ser editada no ano \_\_\_\_\_ pela editora \_\_\_\_\_.

ou

exposição com o título \_\_\_\_\_ que estará patente em \_\_\_\_\_ de --/--/----- a --/--/-----.

ou

edição vídeo com o título \_\_\_\_\_.

ou

no site/blogue <https://www.preprints.org/>

Estas reproduções não podem ser utilizadas para quaisquer outros fins que não os acima declarados e não podem cedidas a outrem, sem autorização expressa do Arquivo Municipal de Lisboa. A publicação/exposição/vídeo/site deve mencionar a proveniência e autoria de cada imagem.

| Título   Código de referência                                                   | Folha(s) |
|---------------------------------------------------------------------------------|----------|
| "Rua Garrett" / PT/AMLSB/ART/027226                                             | ----     |
| "Projecto de transformação de loja (...)" / Obra 4911, Proc. 1047/1ªREP/PG/1917 | 2        |
| "Cinema Tivoli" / PT/AMLSB/FEC/000189                                           | ----     |
| "Panorâmica de Belém (...)" / PT/AMLSB/PAG/000425                               | ----     |
| "Construção de casas económicas (...)" / PT/AMLSB/CMLSB/UROB-PU/10/081          | 6        |

Arquivo Municipal de Lisboa em 11/02/2019

11 A chefe de Divisão de Arquivo Municipal

  
( Helena Neves )  


Supplement: Supplementary file 1 [file supplementary]
